# Supplementary material
Source: PubMed Central journal article supplement (PMC3997096)
Supplement: Supp_Figure1.pdf [file Supp_Figure1.pdf]

## Supplementary Data

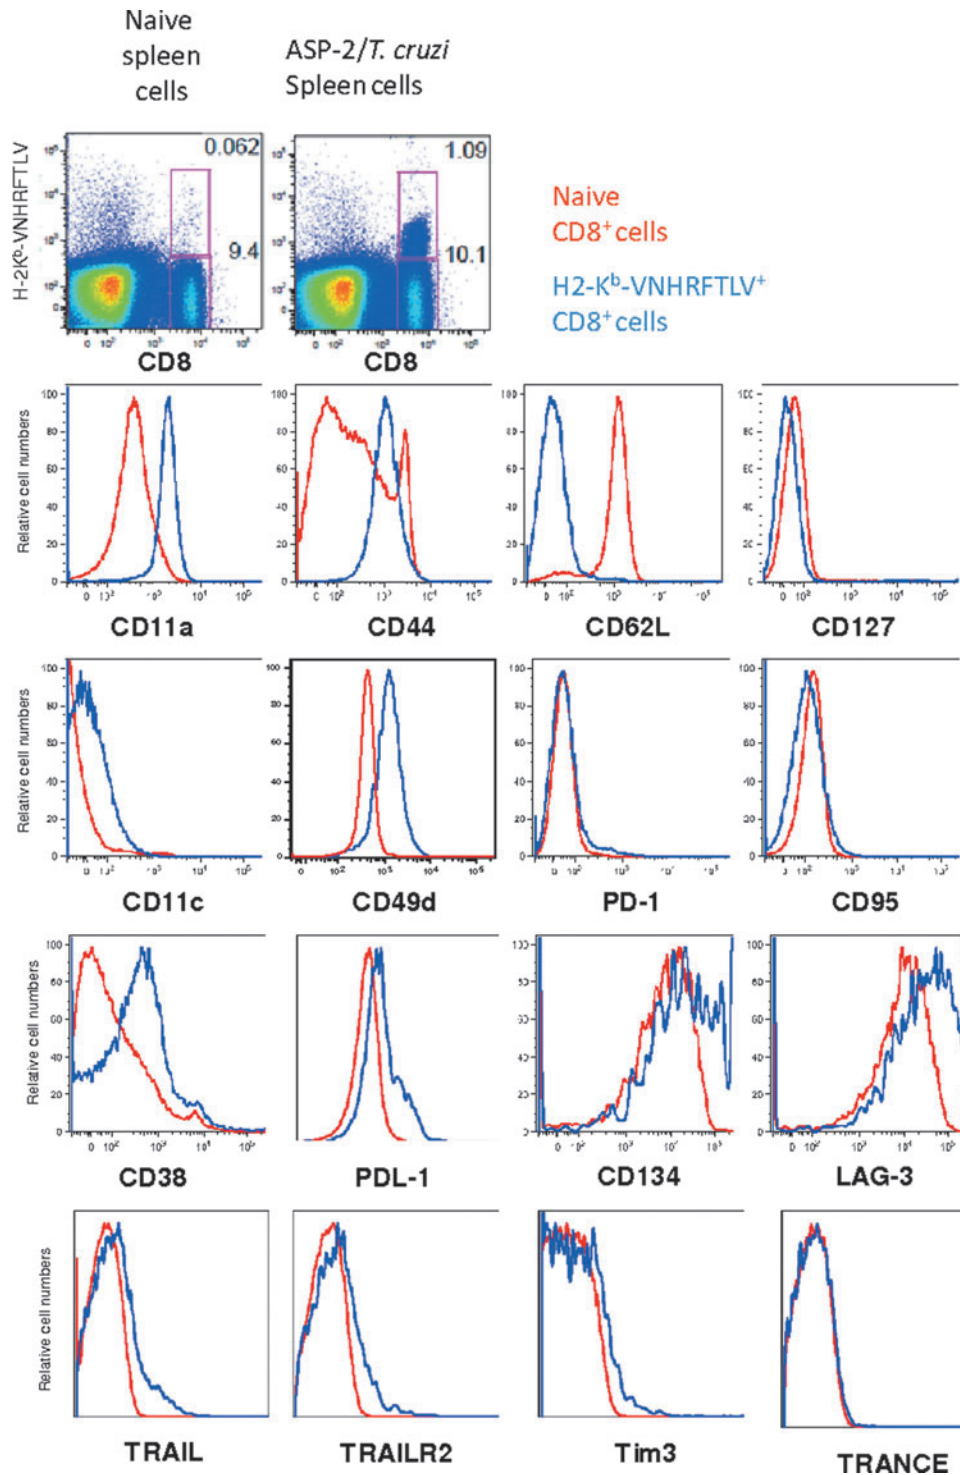

**SUPPLEMENTARY FIG. S1.** Phenotype of specific splenic CD8<sup>+</sup> T cells after infectious challenge with *T. cruzi* in mice vaccinated with the heterologous prime-boost vaccination regimen. C57BL/6 mice were immunized and challenged as described in the legend of Fig. 1. Fourteen days after the challenge, pools of splenic cells from four mice were stained with anti-CD8, H-2K<sup>b</sup>-VNHRFTLV, and antibodies to the indicated surface markers. The red and blue lines denote the naïve CD8<sup>+</sup> cells and H-2K<sup>b</sup>-VNHRFTLV CD8<sup>+</sup> cells, respectively.
