# Supplementary material
Source: PubMed Central journal article supplement (PMC3997096)
Supplement: Supp_Figure2.pdf [file Supp_Figure2.pdf]

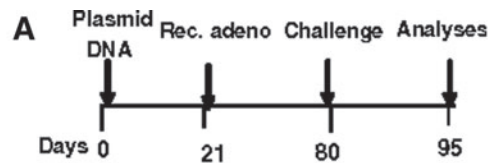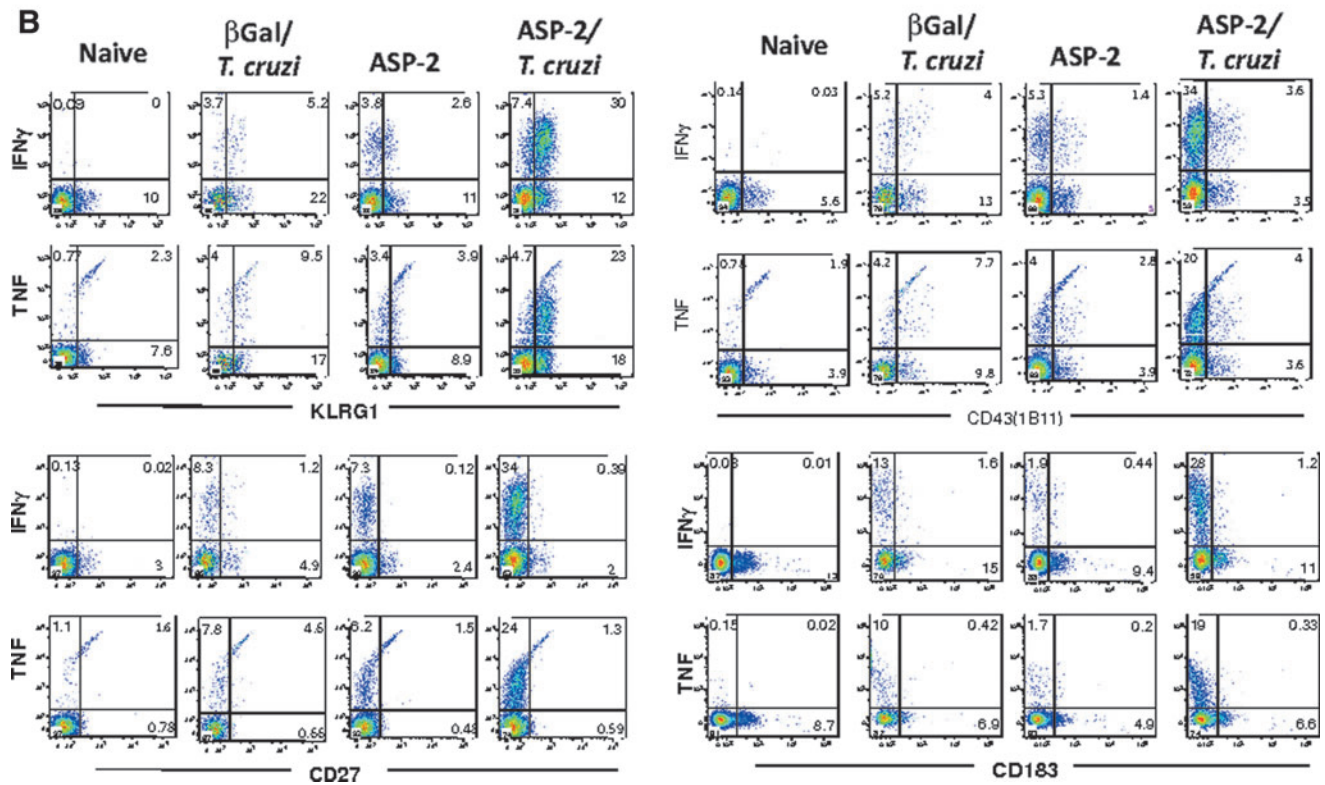

**SUPPLEMENTARY FIG. S2.** Phenotype and function of specific splenic CD8<sup>+</sup> T cells after infectious challenge with *T. cruzi* in mice vaccinated with the heterologous prime-boost vaccination regimen. **(A)** C57BL/6 mice were immunized and challenged as described. **(B)** Splenic cells were restimulated *in vitro* in the presence of the peptide VNHRFTLV, anti-CD28, BdGolgiPlug, and monensin. After 12 hr, the cells were stained with anti-CD8, anti-IFN $\gamma$ , or anti-TNF. In addition, these cells were stained with anti-KLRG1, anti-CD27, anti-CD43, or anti-CD183.
