# Supplementary material
Source: PubMed Central journal article supplement (PMC3997096)
Supplement: Supp_Figure4.pdf [file Supp_Figure4.pdf]

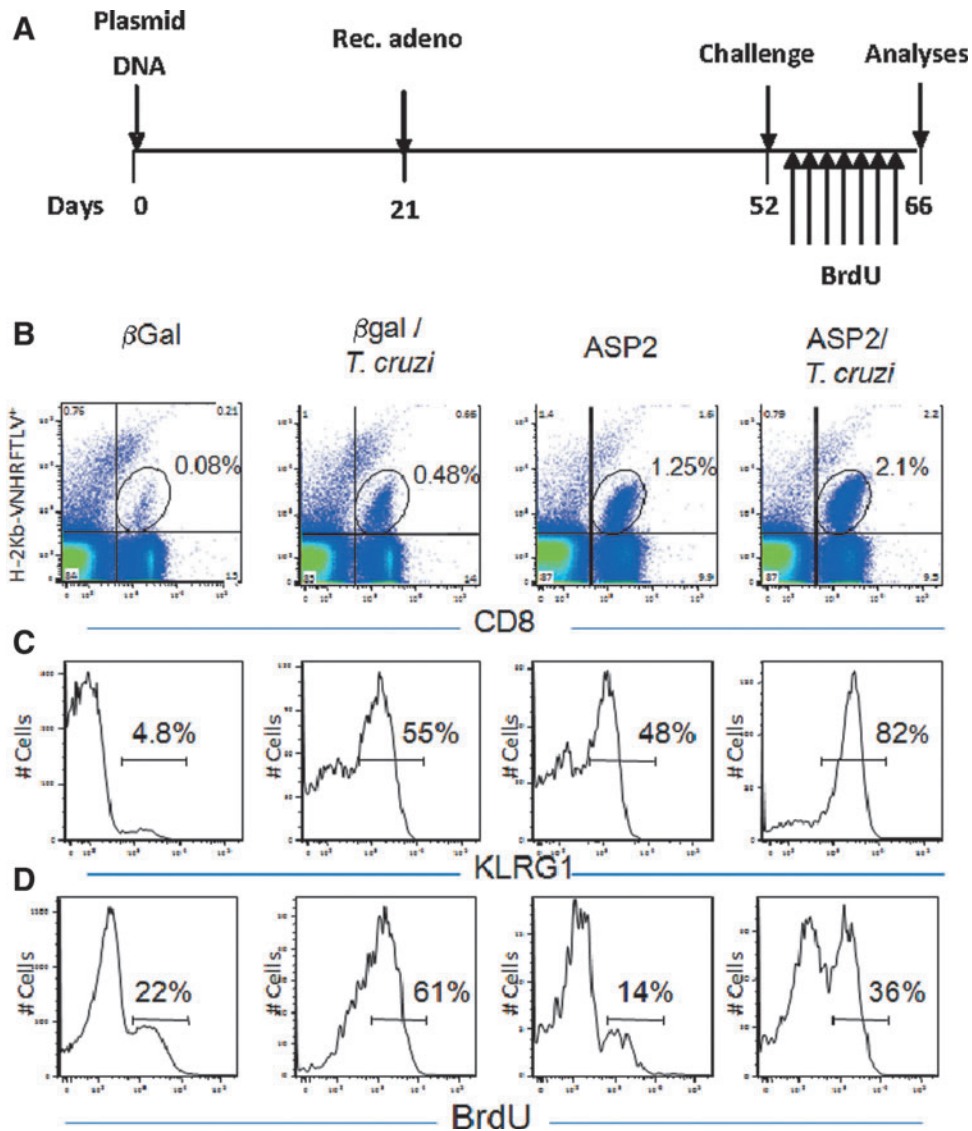

**SUPPLEMENTARY FIG. S4.** Limited proliferation of specific CD8<sup>+</sup> T cells after challenge in mice that have been previously vaccinated with the heterologous prime-boost regimen. (A) GzmBCreERT2/ROSA26YFP transgenic mice were immunized, challenged, and treated as depicted. The mouse groups were the same described in the legend of Fig. 1. (B) Splenic cells were collected at day 66 and stained with anti-CD8 and H-2K<sup>b</sup>-VNHRFTLV. (C) CD8<sup>+</sup>H-2K<sup>b</sup>-VNHRFTLV<sup>+</sup> cells were stained with anti-KLRG1. (D) CD8<sup>+</sup>H-2K<sup>b</sup>-VNHRFTLV<sup>+</sup> cells were stained with anti-BrdU. Results represent pools of four mice per group.
