# Supplementary material
Source: PubMed Central journal article supplement (PMC3997096)
Supplement: Supp_Figure5.pdf [file Supp_Figure5.pdf]

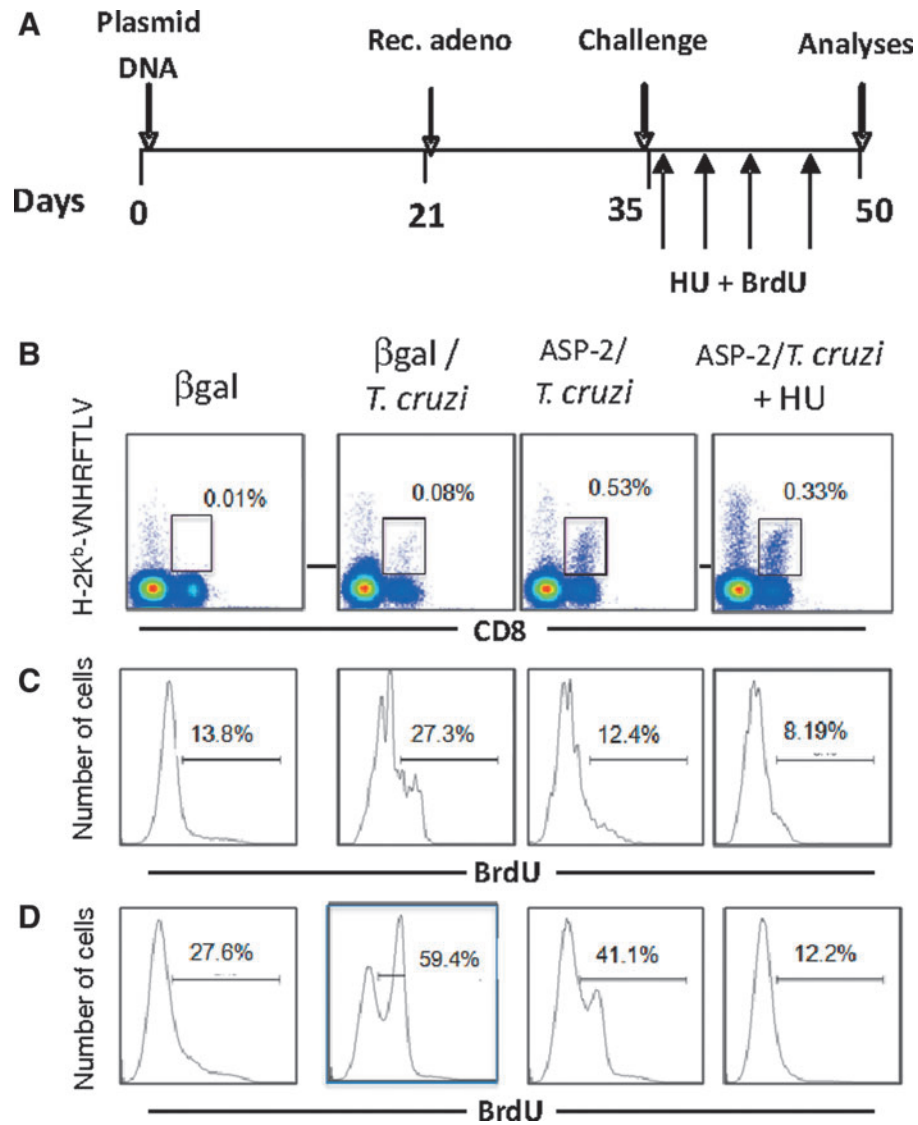

**SUPPLEMENTARY FIG. S5.** Treatment with HU inhibits proliferation of splenic cells in mice challenged with *T. cruzi*. (A) C57Bl/6 mice were immunized, challenged, and treated as depicted. The mouse groups were the same described in the legend of Fig. 6. (B) Splenic cells were collected at day 50 and stained with anti-CD8 and H-2K<sup>b</sup>-VNHRFLTV. (C) CD8<sup>+</sup>H-2K<sup>b</sup>-VNHRFLTV<sup>+</sup> cells were stained with anti-BrdU. (D) Splenic cells were stained with anti-BrdU. Results represent pools of four mice per group.
